# Supplementary material for: Foodborne norovirus outbreak: the role of an asymptomatic food handler
Source: Springer Nature journal article supplement (doi:10.1186/1471-2334-10-269), 2010-09-15
Supplement: 12879_2009_1249_MOESM1_ESM.pdf [file 12879_2009_1249_MOESM1_ESM.pdf]

Number of cases

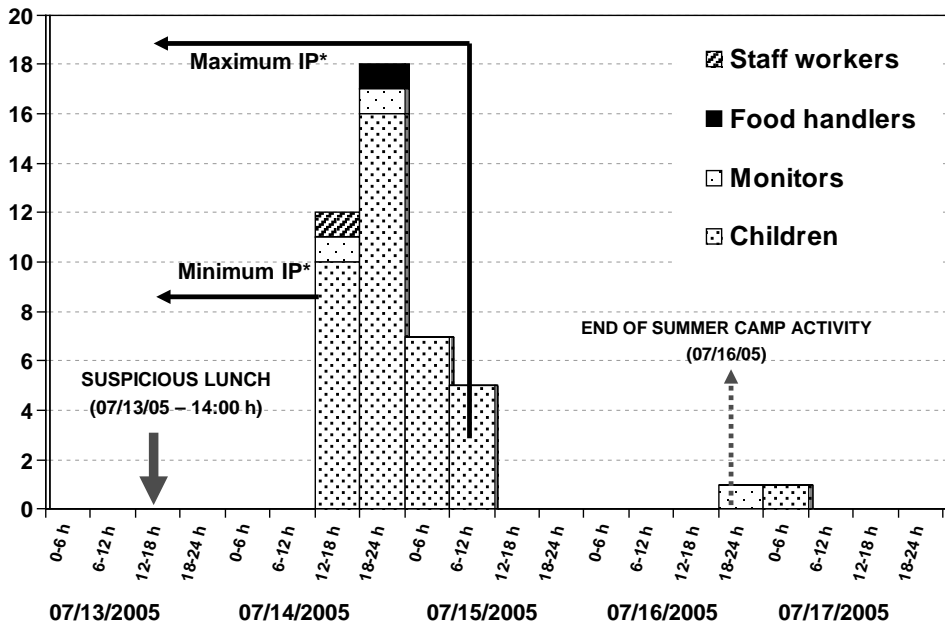

\*Incubation period: 10- 50 hours
